# Supplementary material for: Can controlled drainage control agricultural nutrient emissions? Evidence from a BACI experiment combined with a dual isotope approach
Source: Copernicus journal article supplement (doi:10.5194/hess-2016-303), 2016-07-26
Supplement: Supplementary file [file hess-2016-303-AC1-supplement.pdf]

Dear referee

We highly appreciate your constructive comments and suggestions that will surely improve our manuscript.

To answer your comments best possible we have divided them into small sections which we will respond to individually.

## Material & Methods

- A. More information is needed on the management of the experimental plots particularly on the activities known to alter N leaching. This includes quantity, timing, and quality of fertilisers, as well as ploughing, fallowing, crop choice, and crop yields. In the first paragraph of the M&M it says that, "Field management practices were similar during the three-year study period involving growth of winter wheat and application of identical amounts of manure and fertilizer in the spring." Yet the last line of section 2.5 then says that differences between the plots were due to some being planted with winter wheat and some with barley. In section 2.2 it says that field management data was obtained, and in section 2.1 it says that harvest data was also obtained, yet none of this information is presented in the manuscript. This information needs to be established in order to interpret temporal trends in N losses, as well as differences between the control and treatment plots. I suggest adding a schematic timeline of the management scheme to Fig. 1, as well as including indicators of key events such as fertilizer application and implementation of controlled drainage to Fig. 2.

We appreciate your suggestion and agree with that management data have to be more detailed. To fulfill this we will add a table (shown below) containing management practice to either the main article or to the supplementary. With respect to line 2.2 and 2.5 the management during the experiment (Y0-Y2) was similar (with minor difference in fertilizer amount), but during the year before (2011/12) the experiment spring barley was grown at IP1-1 and CP1, while at CP2 winter wheat was grown, which resulted in lower N concentrations at CP2 in the following autumn, which was our reference year.

| Plots                          | 2011/12          |                  | 2012/2013 (Y0)   |                  | 2013/14 (Y1)     |                  | 2014/15 (Y2)     |                  |
|--------------------------------|------------------|------------------|------------------|------------------|------------------|------------------|------------------|------------------|
|                                | IP1, IP2, CP1    | CP2              | IP1, IP2, CP1    | CP2              | IP1, IP2, CP1    | CP2              | IP1, IP2, CP1    | CP2              |
| <b>Crop</b>                    | SB               | WW               | WW               | WW               | WW               | WW               | WW               | WW               |
| <b>Plowing</b>                 | 26 mar           | 26 sep           | 8 oct            | 17 sep           | 16 sep           | 16 sep           |                  |                  |
| <b>Sowing</b>                  | 27 mar           | 27 sep           | 9 oct            | 18 sep           | 17 sep           | 17 sep           | 18 sep           | 18 sep           |
| <b>Fertilizer application:</b> |                  |                  |                  |                  |                  |                  |                  |                  |
| Pig slurry                     | 10 may           | 19 apr           | 1 may            | 1 may            | 5 may            | 5 may            | 1 may            | 1 may            |
| -amount (ton)                  | 20               | 30               | 30               | 25               | 18               | 18               | 36               | 36               |
| Mineral, 1 <sup>st</sup>       | 27 mar           | 16 mar           | 15 mar           | 8 apr            | 26 mar           | 26 mar           | 20 mar           | 20 mar           |
| -amount (kg)                   | 103 <sup>a</sup> | 156 <sup>b</sup> | 125 <sup>a</sup> | 125 <sup>a</sup> | 200 <sup>c</sup> | 200 <sup>c</sup> | 150 <sup>d</sup> | 125 <sup>d</sup> |
| Mineral, 2 <sup>st</sup>       |                  | 20 apr           | 20 apr           | 9 may            | 15 apr           | 15 apr           | 20 apr           | 20 apr           |
| -amount (kg)                   |                  | 172 <sup>b</sup> | 194 <sup>b</sup> | 194 <sup>b</sup> | 215 <sup>c</sup> | 165 <sup>c</sup> | 100 <sup>b</sup> | 100 <sup>b</sup> |
| <b>Harvest</b>                 | 21 aug           | 21 aug           | 21 aug           | 21 aug           | 21 aug           | 21 aug           | 21 aug           | 21 aug           |
| -yield (hkg ha <sup>-1</sup> ) | 81, 81, 82       | 105              | 98, 100, 97      | 86               | 98, 99, 99       | 99               | 80, 75, 81       | 75               |

SB=spring barley, WW=winter wheat, Fertilizer type: <sup>a</sup>NS 21-24, <sup>b</sup>NS 27-4, <sup>c</sup>NS 28-5, <sup>d</sup>NS 26-13.

- B. There are a couple of caveats to the overarching experimental design that are not explained clearly: 1) tweaking of the water table level in the treatments plots (was the procedure identical in both treatment plots? The date also isn't clear. This should be included both in a field management timeline and indicated on the figures showing changes in the water table over time), and, 2) opening the outflow gate (did this only happen in one of the treatment plots?)

Thanks for pointing this out. The specific dates are not mentioned, but the overall periods are in section 2.1 (line 23-25), however we agree that it is not sufficient and it can be distracting not knowing the dates. In the main article we will notify that the regulation wells at IP1 and IP2 were closed in the end of October (three-five weeks before drain flow began) and the dates where the regulation wells were opened (30/11/2014 and 30/09/2015) (also shown in figure 2). Furthermore, we will add the table shown below to the supplementary information.

However, in section 2.1(line 24-28) the treatments are described. The regulation levels were similar (50 cm) in Y1 at IP1 and IP2 until the 01/28/2014, where the level was increased to 70 cm at IP1, and in Y2 both plots had a level of 70 cm.

|                                                                                                      |                                 |           |
|------------------------------------------------------------------------------------------------------|---------------------------------|-----------|
| Plots with CD                                                                                        | IP1 and IP2                     |           |
| Plots without CD                                                                                     | CP1 and CP2                     |           |
| Management of regulation well at IP 1-2                                                              | closed                          | opened    |
| Y1                                                                                                   | 10-dec-13                       | 11-mar-14 |
| Y2                                                                                                   | 17-nov-14                       | 09-mar-15 |
| Reference period                                                                                     | Y0 (21-nov-2012 to 21-apr-2013) |           |
| Regulation level in<br>Period 2                                                                      | 50 cm *                         |           |
| Period 3                                                                                             | 70 cm                           |           |
| Number of piezometers pr. plot with<br>pressure transducer                                           | 1                               |           |
| Number of piezometers pr. plot without<br>pressure transducer                                        | 8                               |           |
| Frequency of water sampling in piezometers                                                           | 2-3 times a month               |           |
| Frequency of water sampling in the<br>measuring well                                                 | Weekly                          |           |
| Frequency of drain water flow measurement                                                            | Every 10 <sup>th</sup> minute   |           |
| Frequency of ground water level<br>measurements in piezometer<br>with pressure transducer            | Daily**                         |           |
| Frequency of ground water level<br>measurements in piezometer<br>with continuous pressure transducer | 2-3 times a month               |           |

\* until 28 January 2013 for CP1 hereafter 70 cm.

\*\* Often lower frequency due to low inflow time of soil water, thus data from IP2 from all periods was unusable. Dysfunctional pressure transducer at CP1 in beginning of Y0 and at CP2 in Y3.

- C. In the methods section it says that intensive samples were collected during this period, but the data is not shown or discussed. As these events aren't well explained, they do call into question how representative the overall findings are.

We are grateful that you emphasize this and the data will be either added to Fig 2 or as supplementary information. In section 4.3 (line 7-8) of the discussion the results of the intensive sampling is discussed with respect to phosphorus loss, but the information is not discussed with respect to water and nitrate loss, which will be added.

- D. How were the water samples preserved prior to analysis? The lack of mention of any filtration, freezing, etc. make it seem likely that the reported N concentrations and isotopic compositions do not represent the field conditions.

Thanks for pointing this out. The information will be added to the methods.

- E. The first sentence of section 2.5 states that yearly loads were calculated by first dividing the weekly measured nutrient concentrations into daily fluxes via linear interpolation over time. This approach assumes a constant relationship between nutrient export and time. However, this assumption is not consistent with previous findings that, e.g., nitrate concentrations tend to decrease with increased flow. It would therefore be most accurate to calculate total loads based only on the days when stream chemistry data was collected.

Several authors have shown that it is of greater importance to include the daily variation in drain flow which in our case was measured with flow meters, than variation in daily concentration of nutrients. We have in line with most suggestions in the international literature (cf. Kronvang and Bruhn, 1996; Grant et al., 1996) decided also to estimate a daily nutrient concentration and calculate the transport of nutrients by multiplying the measured average daily drain flow and estimated (with linear interpolation from weekly samples) daily concentrations.

Kronvang, B. and Bruhn, A.J., 1996: Choice of sampling strategy and estimation method when calculating nitrogen and phosphorus transport in small lowland streams. *Hydrological Processes*, Vol. 10, 1483-1501.

Grant, R., Laubel, A., Kronvang, B., Andersen, H.E., Svendsen, L.M. and Fuglsang, A., 1996: Loss of dissolved and particulate phosphorus forms in drainage water from four arable catchments on structured soils in Denmark. *Water Research*, 30(11), 2633-2642.

- F. In Table 3 it says that the Y0 column for CP2 is actually filled with values for CP1. What happened to the CP2 data? Why was it excluded? If the data from CP2 was unusable, then this should simply not be included in the table, and a statement about why the data was excluded added to either the results or the M&M. Filling this column with data from the other control plots is misleading, at best.

Thanks to your comments we realize that the footnote of Table 3 is poorly phrased. The data represented in the table is the results from CP2, however these results were omitted from the analysis (BACI and calculation of percentage loss) as winter wheat was grown at this field prior to the experiment (2010/11), while spring barley was grown at the

other plots. The consequence was that N concentrations were much lower at CP2 compared to the other plots in 2012. Thus it was decided to omit the data from CP2 in Y0. This will be explained more clearly in the footnote.

### Data presentation

- G. The data presentation seems overly selective, making it difficult to follow the results or ascertain the accuracy of the conclusions. Most critically: Figure 2 only shows data over time for two of the four plots. The other two need to be included if data from them is going to be discussed. The decision to separate each year into a unique (yet unlabelled) sub-plot also makes this figure hard to follow. I'd recommend plotting data from all four plots over a continuous x-axis, using arrows, lines, or shading to indicate the periods that correspond with the 'y0', 'y1', and 'y2' referred to in the text.

Thanks for stating your interpretation of Fig.2. We choose to show results only from two of the plots (one treated and one control) to make the interpretation of the data easier as the results were much alike and the plots got "crowded" when all four plots were shown in the figure. The results of the two other plots are presented in the supplementary information.

The subplots are labelled (just below the lowest x-axis), but it have to be made more visible if it can be overseen. We have only shown data from the study periods to emphasis the differences in these periods.

- H. Figure 3: This figure only shows data from Y1 and Y2. Where is the Y0 data? Additionally, the meaning of the asterisks adjacent to the  $r^2$  values listed within the plate are not explained in the figure caption, and the slopes reported here do not seem to correspond with those mentioned in the discussion.

We appreciate that you have noticed that the explanation of the asterisks is lacking, which will be added (the asterisks indicate that the relation is significant). Data from Y0 were not shown on purpose in Fig. 3, as we only have data from IP1 (it was a more targeted investigation where we wanted to find out if denitrification was more likely to occur at this plot, due to the high carbon content in the lower root zone), so instead the result was addressed in the discussion. However we will consider adding the data from Y0 and confidence intervals to the Fig.3 to make the interpretation easier, also the results from IP1 in Y0 should be addressed in the results.

None of the slopes shown in the Fig.3 are mentioned in the discussion, as they are shown in the figure. The only slope mentioned in the discussion is the slope of the data from Y0 (which is the data not shown in Fig. 3).

- I. Units are needed for all parameters in Table 1 and Table 3, as well as quantitative information on uncertainty for each number shown

We appreciate your observation and apologies the inconvenience. Units will be added (the unit of table 1 is mm and the unit of table 3 is  $\text{kg ha}^{-1}$ ).

- J. In the final sentence of paragraph three in section 4.1 it says that, "...controlled drainage also resulted in an approximately one-month delay in drain flow compared with control plots.". As drain flow shown in Fig. 1 does not seem to support this, more evidence on where this statement comes from is needed.

The delay can be seen in Fig. 2a (upper-right), however this might be difficult to interpret due to the easily overlooked labels of the figure, which will be changes (see answer G). It is easier to see if the figure is viewed in colour.

- K. Nutrient data is presented as concentrations (when units are shown), but the focus of the paper is 'loss' (i.e., concentration x discharge x time), it would therefore be useful to see the data in flux units ( $\text{g s}^{-1}$ ).

The unit of nutrient data shown in Table 3 is  $\text{kg ha}^{-1}$ .

- L. N<sub>2</sub>O data is only shown in terms of dissolved concentrations. As water in the drainage system will be influenced by both atmospheric N<sub>2</sub>O and biogenic N<sub>2</sub>O, it would be more useful to discuss these findings in terms of % saturation. Emissions of N<sub>2</sub>O from the system also depend on saturation dynamics (see classic description of N<sub>2</sub>O solubility in Weiss & Price (1980) Marine Chemistry).

It is outside the scope of this manuscript to quantify the release and background levels of N<sub>2</sub>O in soil water and drain water as we solely looks at changes in N<sub>2</sub>O between control plots and manipulated plots with controlled drainage in drain water N<sub>2</sub>O concentrations assuming that the background level of N<sub>2</sub>O at any time of year – both atmospheric N<sub>2</sub>O and biogenic N<sub>2</sub>O - is the same in soil water and groundwater in all 4 plots studied.

- M. Section 2.2 says that groundwater (~7 piezometers per plot shown in Fig. 1) was sampled monthly for nutrient concentrations. However, the only groundwater data shown is the (unitless) annual nitrate value in Table 3. How variable were the concentrations over time? Did they differ between the control and treatment plots? How was groundwater data used to calculate N and P losses? What was the P concentration in groundwater?

Thanks for your comments. We agree that too sparse information is given about the nitrate concentrations in the upper groundwater, therefore a figure showing nitrate concentrations in the different piezometer pipes over time will be added to the supplementary information together with a map showing where the piezometers are located (by numbering the piezometers).

Groundwater data was only used to calculate nitrate losses, and the method applied to calculate nitrate loss is mentioned in the methods section 2.5 (line 9-10), however in line 9 it will be further specified that it is nitrate loss via groundwater we are referring to.

- N. More information is need on the spatial and temporal variability in other nutrient parameters discussed (N<sub>2</sub>O, P, NH<sub>4</sub><sup>+</sup>, SO<sub>4</sub>, DON, and PON). While some of this data is included in supplemental figures, the critical parameters should be included in the main manuscript in order to create a coherent and convincing story. This could be as simple as adding information on variability and sample numbers to Table 3.

Table 3 shows total loss in kilogram per hectare and the variability is given in the methods as the uncertainty related to flow measurements ( $\pm 0.3\%$ ) and the detection limit of nutrient measurement (TN, nitrate and ammonium:  $0.050 \text{ mgL}^{-1}$ , TP and phosphate:  $0.0005 \text{ mgL}^{-1}$ ) is stated.

An overview of sampling intensity will be added to the supplementary information (see answer B).

### Data interpretation

- O. Given the experimental design, this paper needs to be organised to more logically: explain how variables are, 1) different in treatment plots before and after induced conditions, and, 2) how treatment plots differed from control plots (i.e., where they the same prior to changed drainage conditions, as in, were the controls actually good controls?). The results and discussion are very disorganised, and the selective data displayed, make it hard to tease out the answer to either of these questions.  
We hope that the changes we have suggested so far based on your comments will make it easier to answer the questions stated above.
- P. The discussion around the NO<sub>3</sub><sup>-</sup> isotope data is a bit hard to follow. First, it would be useful to include a 95% CI for each slope described in Fig. 3 in order to more accurately judge if they overlap with the range expected for denitrification (1:1 – 2:1). As it seems that all of the data does plot roughly along a denitrification line, section 4.4 needs to be revised to discuss the data in terms of NO<sub>3</sub><sup>-</sup> ‘more impacted’ v ‘less impacted’ by denitrification as values move up and down the denitrification line. It would then be useful to discuss what factors influenced these moves. As the authors note in the second paragraph of 4.4, denitrification is probably always occurring somewhere in an arable soil. It’s therefore useful to keep in mind that the leached NO<sub>3</sub><sup>-</sup> isotopes are a reflection of the degree to which denitrification is controlling the NO<sub>3</sub><sup>-</sup> flux, and not direct measures of denitrification activity. This also means that it’s a bit of an overstatement to say that higher NO<sub>3</sub><sup>-</sup> isotopes show enhanced denitrification on a specific day. Instead, this higher value may indicate that reducing conditions dominated in the period prior to sampling (though, as this was only observed in one of the three plots, it also seems possible that this sample wasn’t particularly representative of reality?). Overall the ~1:1 ratio of d18Ovd15N suggests that NO<sub>3</sub><sup>-</sup> leached from the plots has undergone variable degrees of denitrification. So what controls these variations? Did isotope values increase in response to rainfall, season, temperature? And are these variations different between the control and treatment plots? I suggest checking out the paper recent advances in the interpretation of NO<sub>3</sub><sup>-</sup> isotope data from, e.g., Hall et al. (2016) *Oecologia* and Wells et al. (2016) *Water Resources Research* when re-evaluating this data.  
This section will be reevaluated. However the statement that denitrification occurred at a specific day is based on observations of nitrate, ammonium and sulphate concentrations and isotope analysis at this date, which all indicate denitrification, and not stable isotopes alone. In the article we suggest it could be due to the altered hydrology, increasing retention time and possibly creating anoxic conditions, but this we do not know this. We only see that drain flow is low around this time.  
It must be kept in mind that the scope of the article was not to investigate the factors affecting denitrification, but to outline how controlled drainage affected water fluxes and pathways (tile drain and groundwater) within and from the plots studied, nitrate fluxes and pathways and any signs of changes in denitrification and nutrient swapping (impacts on N<sub>2</sub>O and phosphorus).
- Q. The abstract and conclusion both mention ‘pollution swapping’, whereby decreases in NO<sub>3</sub><sup>-</sup> leaching are countered by increases in N<sub>2</sub>O emissions. Here the drain N<sub>2</sub>O data is interested from the point of view of obtaining a more complete picture of N leaching

losses, but not conclusive evidence for/against pollution swapping. This is because soil surfaces are the primary source of N<sub>2</sub>O emissions (and thus the focus of concern in 'pollution swapping' follow drainage manipulation). Additionally, it is unclear if / how dissolved N<sub>2</sub>O was affected by controlled drainage, as in the first paragraph of section 4.4 it says that N<sub>2</sub>O-N was higher in the impacted plots, but then in the next paragraph it says that differences in N<sub>2</sub>O-N concentrations were not significant.

You raise a very valid point about pollution swapping, however we did primarily focus on pollution swapping with respect to losses via drain water, but we agree that nitrous oxide emission is the greatest from the soil surface, so we will revise this paragraph and include reference to study of measurements of N<sub>2</sub>O emissions. The loss of nitrous oxide from the surface was investigated by another research group and results from this study will be published this autumn (they found no difference between impacted and control plots).

Regarding how N<sub>2</sub>O-N was affected by controlled drainage the first sentence of section 4.4 (line 14-15) is about Y1, where nitrous oxide concentrations were significantly higher, while the next paragraph (line 25-26) is about Y2, where nitrous oxide were not significantly higher, but higher than at the control plots (Fig. S3 and S11, Table 2).

- R. The conclusions seem to say that the manuscript makes no contribution towards understanding controlled drainage systems. A clearer case for why this manuscript should be published / read is needed.

This is another very important and highly useful point, and the conclusion will be rewritten emphasizing the novelty of this study regarding our findings and the need for further research on the topic.

Again, we appreciate all of your insightful and useful comments. We have tried to take into consideration all of your comments and will improve the manuscript accordingly. Again we are thankful to you for taking the time and energy to help us improve the paper.
